# Supplementary material
Source: PubMed Central journal article supplement (PMC3985980)
Supplement: supp_1.4.E134_Original_submission.pdf [file supp_1.4.E134_Original_submission.pdf]

## POPULATION-BASED STAGE, TREATMENT AND OUTCOMES FOR PATIENTS DIAGNOSED WITH BREAST CANCER IN BRITISH COLUMBIA IN 2002

A. Davidson<sup>1</sup>, S. Chia<sup>2,3</sup>, R. Olson<sup>4</sup>, A. Nichol<sup>6</sup>, C. Speers<sup>2</sup>, A. Coldman<sup>5</sup>, C. Bajdik<sup>3</sup>, R. Woods<sup>2</sup>, and S. Tyldesley<sup>2,6</sup>.

**Background:** The purpose of this study was to describe the stage, treatment, and outcomes at a population level for patients with breast cancer in British Columbia (BC).

**Methods:** All incident breast cancer cases registered with Breast Cancer in 2002 were reviewed for information on stage, treatment with primary local surgery, chemotherapy (CT), hormone therapy (HT), and radiotherapy (RT) and outcomes were derived from cancer centre databases for patients referred to provincial cancer centres (85% of cases). For non-referred cases, stage was estimated from manual review of pathology reports available in the provincial tumour registry. Kaplan-Meier curves for BCSS and OS were calculated by stage.

**Results:** There were 2,927 incident cases of breast cancer identified in 2002. Stage distribution was: 0 (*in situ*): 15%, I: 38%, II: 32%, III: 8%, IV: 4% and unknown 3%. Age distribution was: <40: 4%, 40's: 18%, 50's: 25%, 60's: 23%, 70's: 20% and ≥80 years old: 10%. The treatments delivered within 1 year of diagnosis were: RT-56%, CT-32% and HT-57%. The 10-year BCSS rates were for stage: 0: 99.5%, I: 95%, II: 81%, III: 55%, and IV: 4%. The 10-year OS rates were, for stage: 0: 89%, I: 81%, II: 68%, III: 43%, and IV: 2%.

**Interpretation:** This analysis provides a Canadian benchmark for treatment rates and 10 year outcomes by stage for all incident cases of breast Cancer. Outcomes in BC compare well to published rates in the USA and Europe.

## INTRODUCTION

1  
2  
3 Outcomes for breast cancer patients have improved considerably in recent years.  
4  
5 Although breast cancer remains the most common cancer and the second leading  
6  
7 cause of cancer deaths in women, the 5-year relative survival rate rose from 75% in the  
8  
9 late 1970's to 90% by 2006 (1). Significant factors potentially contributing to these  
10  
11 improvements include the availability of breast screening (2-4) and the increasingly  
12  
13 multidisciplinary nature of cancer care, appropriate surgery, radiation treatment (5-7),  
14  
15 and systemic therapy (8,9). Despite these encouraging improvements in breast cancer  
16  
17 outcomes, disparities still exist within and among populations (10-12). Reasons for  
18  
19 these differences relate in part to variation in utilization of screening, diagnostic, and  
20  
21 treatment modalities. In order to optimally benefit from important advances, an effective  
22  
23 provider of cancer care services must ensure that individuals in a given population have  
24  
25 equal access to these modalities.  
26  
27  
28  
29  
30  
31  
32

33 British Columbia has been identified as a population having one of the best breast  
34  
35 cancer survival rates in the world (10). There are many potential factors accounting for  
36  
37 the favourable outcome. BC is part of a country with a strong economy and a fully  
38  
39 publicly funded cancer care system. BC organized the first public screening  
40  
41 mammogram program in Canada, which currently screens approximately 50% of its  
42  
43 target population (13). Mammography screening is available within the provincial health  
44  
45 plan to BC women, free of charge, through the Screening Mammography Program of  
46  
47 BC (SMPBC). Coldman and colleagues have previously reported that SMPBC  
48  
49 participation is associated with a lower rate of chemotherapy use and an increased rate  
50  
51 of breast-conserving surgery (14). BC also has a centralized organized cancer care  
52  
53 program through the BC Cancer Agency (BCCA), which provides, for free, all  
54  
55 radiotherapy and provides, for free, all chemotherapy and hormone therapy that is  
56  
57  
58  
59  
60

1 prescribed in the province. Although there are significant geographic issues within the  
2 province, which cause some regional variation in access (15), the referral rate for a  
3 breast cancer patient to a BCCA centre for the province as a whole was 85%  
4 throughout the 2000's.  
5  
6  
7  
8  
9

10  
11 For many decades the BCCA has developed treatment guidelines and disseminated  
12 them to all the physicians in the province and is often the first province in Canada to  
13 implement new therapeutic agents and regimens. Due to the quality of the outcomes,  
14 treatment and stage data, outcomes for patients with breast cancer in British Columbia  
15 have been used in international studies assessing prognostic information and to validate  
16 prognostic models used in clinics internationally (16) but there has been no  
17 comprehensive paper describing outcomes and treatment rates with long term follow-  
18 up. With these considerations in mind, the primary objective of this study was to  
19 describe the patient characteristics, stage distribution, stage-specific treatment  
20 utilization and outcomes at a population level for all patients diagnosed with breast  
21 cancer in BC in 2002. Our second objective was to compare the stage distribution and  
22 survival by stage for breast cancer patients in BC to published international reports from  
23 American and European databases, where available.  
24  
25  
26  
27  
28  
29  
30  
31  
32  
33  
34  
35  
36  
37  
38  
39  
40  
41  
42  
43  
44

## 45 **METHODS**

46  
47 The BCCA has a mandate to deliver cancer care services to the culturally,  
48 economically, and geographically heterogeneous population of BC (17). There is a legal  
49 requirement to send all pathology reports with a neoplastic diagnosis to the British  
50 Columbia Cancer Registry, which thereby captures all incident cases of breast cancer.  
51  
52 Death and cause of death information are collected by Vital Statistics. All radiotherapy  
53 was provided at one of the four BCCA cancer centres, which are the only providers of  
54  
55  
56  
57  
58  
59  
60

1 RT in the province, in 2002. All funded anti-cancer drugs are reimbursed by the BCCA,  
2 and each drug, dose, and dispensing date is recorded in the BCCA pharmacy data  
3 repository since 1998. This information is available to the Breast Cancer Outcomes  
4 Unit (BCOU) and its periodic review is an important index of performance for the  
5 delivery of breast cancer care to residents of British Columbia.  
6  
7  
8  
9  
10

11  
12  
13  
14 All incident patients with breast cancer diagnosed between January 1<sup>st</sup> and December  
15 31<sup>st</sup> of 2002 were identified from the BC Cancer Registry. Cases were then linked to  
16 radiotherapy records and to the BCCA pharmacy data repository. Pre-treatment  
17 prognostic factors such as grade, stage, lymphatic and vascular invasion, estrogen  
18 receptor, tumour size, and nodal status, as well as primary surgical therapies, were  
19 collected prospectively in the BCOU for the cases referred to the BCCA.  
20  
21  
22  
23  
24  
25  
26  
27  
28  
29  
30

31 For cases not referred to the BCCA, registry pathology records were reviewed to  
32 determine the grade, ER, tumour size, nodal status, and definitive local and regional  
33 surgery. Stage was determined for these cases based on the pathology reports.  
34 Utilization of radiotherapy (RT), chemotherapy (CT), and hormone therapy (HT) within  
35 one year of diagnosis were extracted by stage. For cases not referred to the BCCA,  
36 systemic therapy dispensed at other institutions is still captured by the BCCA pharmacy  
37 database.  
38  
39  
40  
41  
42  
43  
44  
45  
46  
47  
48  
49

50 Patients diagnosed with breast cancer in BC during the 2002 year were matched to the  
51 SMPBC records and screening information was extracted, including whether or not the  
52 cancer was screen-detected. The definition of a screen-detected cancer was a breast  
53 cancer diagnosis within one year of an abnormal screen. Patients were considered  
54 attendees of the SMPBC if they had a screening mammogram result listed in SMPBC  
55  
56  
57  
58  
59  
60

1 records. Those who had been screened within the 30 months prior to their diagnosis  
2 were considered active attendees.  
3  
4  
5  
6

7 Overall and disease-specific survivals were calculated using the Kaplan-Meier method.  
8  
9 This study was approved by the University of British Columbia BCCA Research Ethics  
10 Board.  
11  
12  
13

## 14 15 16 17 **RESULTS**

### 18 19 **Patient Characteristics and Stage Distribution**

20  
21 In 2002, there were 2,927 incident cases of breast cancer diagnosed in the province of  
22 British Columbia. Figure 1 demonstrates the stage distribution and Table 1  
23 characterizes the patient population by stage of disease at presentation. The majority  
24 of cases, 82%, represented invasive disease, whereas 14% were in situ and 3%  
25 unknown. Approximately 70% of tumors were found to be either stage I or stage II at  
26 diagnosis. The stage distribution is compared with that of the United States  
27 Surveillance Epidemiology and End Results (SEER) in Table 2 (18).  
28  
29  
30  
31  
32  
33  
34  
35  
36  
37  
38  
39

40 The vast majority (86%) of breast cancers were diagnosed in patients between the ages  
41 of 40 and 79. Overall, the median age at diagnosis for all stages was 61, with only 5%  
42 of patients younger than 40 and only 10% older than 80. Elderly patients formed a  
43 greater percentage of those presenting with more advanced disease than with either in  
44 situ or early-stage disease.  
45  
46  
47  
48  
49  
50  
51

52 Over 50% of all breast cancer patients were attendees of the SMPBC, and the majority  
53 of all patients diagnosed with in situ (71%) or stage I disease (63%), had been screened  
54 within the 30 months prior to their diagnosis. In contrast, most patients diagnosed with  
55 stage II-IV breast cancer were not attendees of the SMPBC. Only 46% of stage II, 35%  
56  
57  
58  
59  
60

1 of stage III patients and 27% of stage IV patients had been screened within the 30  
2 months prior to their diagnosis. Of all breast cancers diagnosed, 33% were considered  
3 “screen-detected”, though this designation applied to 62% of cancers found in the 1,574  
4 breast cancer patients who were attendees of the provincial screening program.  
5  
6  
7  
8  
9

### 10 11 **Treatment Characteristics**

12 The majority of patients with disease ranging from in situ to stage III underwent surgery  
13 for their breast cancer (Table 3). Approximately two-thirds of patients with in situ  
14 disease underwent breast-conserving surgery (BCS) but only one-third received  
15 radiation therapy. Few in situ patients received hormonal treatment within one year of  
16 diagnosis (22%)  
17  
18  
19  
20  
21  
22  
23  
24  
25  
26  
27

28 For patients in the stage I category, again, approximately two-thirds received breast-  
29 conserving surgery (BCS), with the remainder treated with mastectomy. Of stage I and  
30 II patients treated with BCS, 88% also received radiotherapy within 1 year of diagnosis.  
31 Patients with stage II disease at presentation were equally likely to undergo mastectomy  
32 or BCS, whereas two-thirds of stage III patients underwent mastectomy as their initial  
33 surgery. Though the percentage of patients undergoing BCS as the initial surgery  
34 decreased from stage I to stage III (from 65% to 15%), the percentage of patients  
35 receiving radiation therapy within a year of diagnosis increased (from 59% to 77%). As  
36 would perhaps be expected, the percentage of patients that received chemotherapy  
37 increased with increasing stage (from 14% of stage I patients to 71% of stage III  
38 patients). Approximately 65% of patients with stage I-III cancer were treated with  
39 hormonal therapy. When only estrogen receptor-positive (ER+) patients are  
40 considered, there is little change to the in situ treatment rate, but 73% of stage I patients  
41  
42  
43  
44  
45  
46  
47  
48  
49  
50  
51  
52  
53  
54  
55  
56  
57  
58  
59  
60

1 received hormonal treatment compared with 86% of stage III and 81% of the stage IV  
2 patients.  
3  
4  
5  
6

7 Models of optimal radiotherapy utilization have been developed (19-20), and Table 4  
8 demonstrates a comparison between the BCCA data from the 2002 cohort and these  
9 published ideal utilization rates. The actual BCCA RT rate at 5 years of 59% for all  
10 disease stages compares well with the estimated ideal rate of 66% from a Canadian  
11 model but is lower than the estimated ideal rate from Australia (83%) (19,20). The  
12 difference between actual and ideal rates likely relates to differences in patient  
13 preferences are dealt with in the models (19,20). Ideal utilization rates have also been  
14 published for chemotherapy (21), and chemotherapy use for all stages is lower in the  
15 BCCA 2002 cohort than the ideal published rates, most notably for those patients with  
16 stage I disease but also for patients with stage III breast cancer. Endocrine therapy use  
17 in BC, however, exceeds the published ideal rate for all stages (22).  
18  
19  
20  
21  
22  
23  
24  
25  
26  
27  
28  
29  
30  
31  
32  
33  
34  
35

36 We have previously described differences in stage distribution and frequency of types of  
37 breast cancer treatments depending on population density within the province (15).  
38  
39  
40  
41  
42

### 43 **Patient Outcomes**

44 Disease-specific survival (DSS) and overall survival (OS), for all stages and divided by  
45 stage, for breast cancer patients diagnosed in British Columbia in the year 2002 are  
46 shown in Figure 2. The 5 year DSS for all stages combined in 2002 was 89% (95% CI:  
47 88 - 90%) and the OS was 83% (95% CI: 81 - 84%). The 10 year DSS was 83.8%  
48 (95% CI: 82.4 – 85.2%) and the OS was 70.6% (95% CI: 68.8 - 72.4%).  
49  
50  
51  
52  
53  
54  
55  
56  
57  
58  
59  
60

1 Initiatives have been undertaken in other parts of the world to evaluate the effectiveness  
2 of healthcare service delivery for patients with cancer in their respective countries, and  
3 data have been published from these cancer registries {10-12, 22, 23). In Table 5,  
4 relative survival data for breast cancer patients diagnosed in a similar time period in  
5 other countries were compared with the British Columbia relative survival rates for the  
6 2002 cohort. The 5-year relative survival rate for the entire cohort of patients diagnosed  
7 with breast cancer in BC in 2002 was 90% (95% CI 88 – 91%), which numerically is  
8 higher than, or equivalent to, many European countries and similar to the relative  
9 survival rates in the United States SEER databases.  
10  
11  
12  
13  
14  
15  
16  
17  
18  
19  
20  
21  
22  
23  
24  
25

## 26 **INTERPRETATION**

27  
28 Outcomes for patients with breast cancer in British Columbia have been used in  
29 international studies assessing prognostic information and to validate prognostic models  
30 used in clinics throughout the world. This descriptive study of 2,927 breast cancer  
31 patients diagnosed in BC in the year 2002 demonstrates a stage distribution heavily  
32 weighted toward early-stage disease, particularly stages I and II. Most early-stage  
33 cancers were diagnosed in patients aged 40 to 79 years old. The case mix presented  
34 here is similar to that reported by the NCCN, a large national database in the United  
35 States (18).  
36  
37  
38  
39  
40  
41  
42  
43  
44  
45  
46  
47  
48  
49

50 Over 60% of in situ and stage I diagnoses occurred in patients who were attendees of  
51 the Screening Mammography Program of British Columbia, whereas the majority of  
52 stage III and IV diagnoses occurred in patients who had not been screened. In patients  
53 attending the SMPBC, most cancers were screen-detected, including over 70% of in  
54 situ and stage I cancers. Most patients with early-stage disease underwent breast-  
55  
56  
57  
58  
59  
60



1 conserving surgery, and adjuvant radiation therapy, whereas most patients with stage III  
2 breast cancer were treated with mastectomy and adjuvant radiation therapy. Use of  
3 both chemotherapy and endocrine therapy increased with increasing stage of disease,  
4 up to stage III. Use of radiation therapy and chemotherapy fall slightly below published  
5 ideal utilization rates, based on reviews of existing international guidelines, but compare  
6 well with other international jurisdictions. Use of endocrine therapy in BC exceeds  
7 calculated ideal utilization rates.  
8  
9  
10  
11  
12  
13  
14  
15  
16  
17  
18

19 In recent years, data has been published from cancer registries in several regions of the  
20 world and survival rates in British Columbia are comparable to those reported from  
21 other regions such as the US, Europe, and Australia. These findings suggest that the  
22 BCCA is meeting its objective of providing timely, evidence-based cancer care services  
23 to residents of this province in the context of a widely accessible healthcare system.  
24  
25  
26  
27  
28  
29  
30  
31  
32

33 Despite the comprehensive nature of the BCCA records, this report has limitations  
34 which bear consideration. As mentioned, the referral rate to the BCCA was 85%, so  
35 there was not complete data available for all breast cancer patients treated in BC but  
36 attempts were made through pathology record review in the BC Cancer Registry to  
37 garner information about non-referred cases. In 2002, HER2/*neu* status, an important  
38 prognostic and predictive indicator, was not routinely measured in early breast cancer  
39 patients because the evidence for trastuzumab (anti-HER 2 antibody) efficacy in  
40 adjuvant therapy had yet to emerge. Finally, treatments were recorded as being given,  
41 when patients received even one dose of chemotherapy or radiotherapy and a first  
42 prescription for endocrine therapy within one year of diagnosis, and do not reflect  
43 completion of systemic therapy. The non-adherence rate in British Columbia for  
44 adjuvant endocrine therapy has been reported as 40%, but compliance with  
45  
46  
47  
48  
49  
50  
51  
52  
53  
54  
55  
56  
57  
58  
59  
60

1 chemotherapy and radiotherapy have not been reported (24). Compliance, if different  
2 between populations, has the potential to affect comparative patient outcomes, but the  
3 primary focus of this report was the description of patient characteristics, treatment, and  
4 outcomes in BC.  
5  
6  
7  
8  
9

10  
11 In conclusion, this report indicates that breast cancer survival rates in BC are  
12 comparable to those reported in the literature from other regions of the world. The  
13 majority of patients diagnosed with early-stage disease were treated with breast-  
14 conserving surgery, as well as adjuvant radiotherapy and hormonal treatment.  
15 Continued data collection and periodic reviews are important to ensure that as breast  
16 cancer therapy evolves and its delivery to such a diverse population becomes more  
17 complex, the publicly funded provincial healthcare system is able to meet the  
18 challenges of universal access, and that the subsequent outcomes are comparable to  
19 those of any developed region of the world. The favourable results in British Columbia  
20 should serve as a benchmark for the rest of the provinces in Canada, and demonstrates  
21 the results that can be achieved with a centralized and comprehensive provincial cancer  
22 care program.  
23  
24  
25  
26  
27  
28  
29  
30  
31  
32  
33  
34  
35  
36  
37  
38  
39  
40  
41  
42

## 43 REFERENCES

- 44  
45  
46 1. Siegel R, Ward E, Brawley O *et al.*: Cancer statistics, 2011: The impact of eliminating  
47 socioeconomic and racial disparities on premature cancer deaths. *CA Cancer J Clin*  
48 61:212-236, 2011.  
49  
50
- 51 2. Olivotto IA, Mates D, Kan L *et al.*: Prognosis, treatment, and recurrence of breast  
52 cancer for women attending or not attending the Screening Mammography Program of  
53 British Columbia. *Breast Cancer Res Treat* 54:73-81, 1999.  
54  
55
- 56 3. Schopper D, de Wolf C: How effective are breast cancer screening programmes by  
57 mammography? Review of the current evidence. *Eur J Cancer* 45: 1916-1923, 2009.  
58  
59  
60

- 1  
2  
3  
4  
5  
6  
7  
8  
9  
10  
11  
12  
13  
14  
15  
16  
17  
18  
19  
20  
21  
22  
23  
24  
25  
26  
27  
28  
29  
30  
31  
32  
33  
34  
35  
36  
37  
38  
39  
40  
41  
42  
43  
44  
45  
46  
47  
48  
49  
50  
51  
52  
53  
54  
55  
56  
57  
58  
59  
60
4. Christensen LH, Engolm G, Cortes R *et al.*: Reduced mortality for women with mammography-detected breast cancer in east Denmark and south Sweden. *Eur J Cancer* 43:2773-2780, 2006.
5. Clarke M, Collins R, Darby S *et al.*: Effects of radiotherapy and of the extent of surgery for early breast cancer on local recurrence and 15-year survival: an overview of the randomised trials. *Lancet* 366:2087-2106, 2005.
6. Dragun AE, Huang B, Tucker TC *et al.*: Disparities in the application of adjuvant radiotherapy after breast-conserving therapy for early stage breast cancer: Impact on overall survival. *Cancer* 117(12): 2590-2598, 2011.
7. Martinez SR, Tseng WH, Carter RJ *et al.*: Do radiation use disparities influence survival in patients with advanced breast cancer? *Cancer* Jun 20. doi: 10.1002/cncr.26231. [Epub ahead of print]
8. Early Breast Cancer Trialists' Collaborative Group (EBCTCG): Effects of chemotherapy and hormonal therapy for early breast cancer on recurrence and 15-year survival: an overview of the randomised trials. *Lancet* 365:1687-1717, 2005.
9. Chia SK, Speers CH, D'yachkova Y *et al.*: The impact of new chemotherapeutic and hormonal agents on survival in a population-based cohort of women with metastatic breast cancer. *Cancer* 110:973-979, 2007.
10. Coleman MP, Forman D, Bryant H *et al.*: Cancer survival in Australia, Canada, Denmark, Norway, Sweden, and the UK, 1995-2007 (the International Cancer Benchmarking Partnership): an analysis of population-based cancer registry data. *Lancet* 377:127-138, 2011.
11. Verdecchia A, Francisci S, Brenner H *et al.*: Recent cancer survival in Europe: a 2000-2002 period analysis of EURO CARE-4 data. *Lancet Oncol* 8:784-796, 2007.
12. Coleman MP, Quaresma M, Berrino F *et al.*: Cancer survival in five continents: a worldwide population-based study (CONCORD). *Lancet Oncol* 9:730-756, 2008.
13. BC Cancer Agency Screening Mammography Program 2012 Annual Report. [http://www.smpbc.ca/NR/rdonlyres/3AF15A7A-B9D4-43C2-A93A-230A634E94AC/60300/SMP\\_2012AR\\_WEB.pdf](http://www.smpbc.ca/NR/rdonlyres/3AF15A7A-B9D4-43C2-A93A-230A634E94AC/60300/SMP_2012AR_WEB.pdf) (Accessed on line Nov 14, 2012).
14. Coldman AJ, Phillips N, and Speers C: A retrospective study of the effect of participation in screening mammography on the use of chemotherapy and breast conserving surgery. *Int J Cancer* 120:2185-2190, 2007.
15. Olson RA, Nichol A, Caron NR, Olivotto IA, Speers C, Chia S, Davidson A, Coldman A, Bajdik C, Tyldesley S. Effect of community population size on breast cancer screening, stage distribution, treatment use and outcomes *Can J Public Health*. 2012 Jan-Feb;103(1):46-52.
16. Olivotto IA, Bajdik CD. ADJUVANT! – A validated, web-based, systemic therapy decision aid for early-stage breast cancer. *Am J Oncol Review* 2005;4(Suppl 13):29-31.
17. BC Stats. [www.bcstats.gov.bc.ca](http://www.bcstats.gov.bc.ca) (accessed July 10, 2011)

- 1 18. Gloeckler Ries LA, Eisner MP. SEER Cancer Monograph: Cancer Survival Among  
2 Adults, Chapter 13: Cancer of the Breast. (accessed on line Nov 14, 2012)  
3 [http://seer.cancer.gov/publications/survival/surv\\_toc.pdf](http://seer.cancer.gov/publications/survival/surv_toc.pdf)  
4
- 5  
6 19. Foroudi F, Tyldesley S, Walker H et al. An evidence-based estimate of appropriate  
7 radiotherapy utilization rate for breast cancer. *Int J Rad Onc Biol Phys* 2002; 53(5):  
8 1240-1253.  
9
- 10  
11 20. Delaney F, Barbon M, Jacob S: Estimation of an optimal radiotherapy utilization  
12 rate for breast carcinoma. *Cancer* 98:1977-86, 2003.  
13
- 14  
15 21. Ng W, Delaney GP, Jacob S, Barton MB: Estimation of optimal chemotherapy  
16 utilization rate for breast cancer: setting an evidence-based benchmark for the best-  
17 quality cancer care. *Eur J Cancer* 2010; 46: 703-712.  
18
- 19  
20 22. Fong A, Ng W, Barton MB, Delaney GP: Estimation of an evidence-based  
21 benchmark for the optimal endocrine therapy utilization rate in breast cancer. *Breast*  
22 2010; 19: 345-349.  
23
- 24  
25 23. Gondos A, Volker A, Holleczeck B *et al.*: Cancer survival in Germany and the United  
26 States at the beginning of the 21<sup>st</sup> century: An up-to-date comparison by period  
27 analysis. *Int J Cancer* 121:395-400, 2007.  
28
- 29  
30 24. Chan A, Speers C, O'Reilly S, Pickering R, Chia SK. Adherence of adjuvant hormone  
31 therapies in post-menopausal hormone receptor positive (HR+) early stage breast  
32 cancer: A Population Based study from British Columbia. *Cancer Research* 2009; 69(4):  
33 494s.  
34  
35  
36  
37  
38  
39  
40  
41  
42  
43  
44  
45  
46  
47  
48  
49  
50  
51  
52  
53  
54  
55  
56  
57  
58  
59  
60

TABLES & FIGURES

Figure 1. Stage Distribution

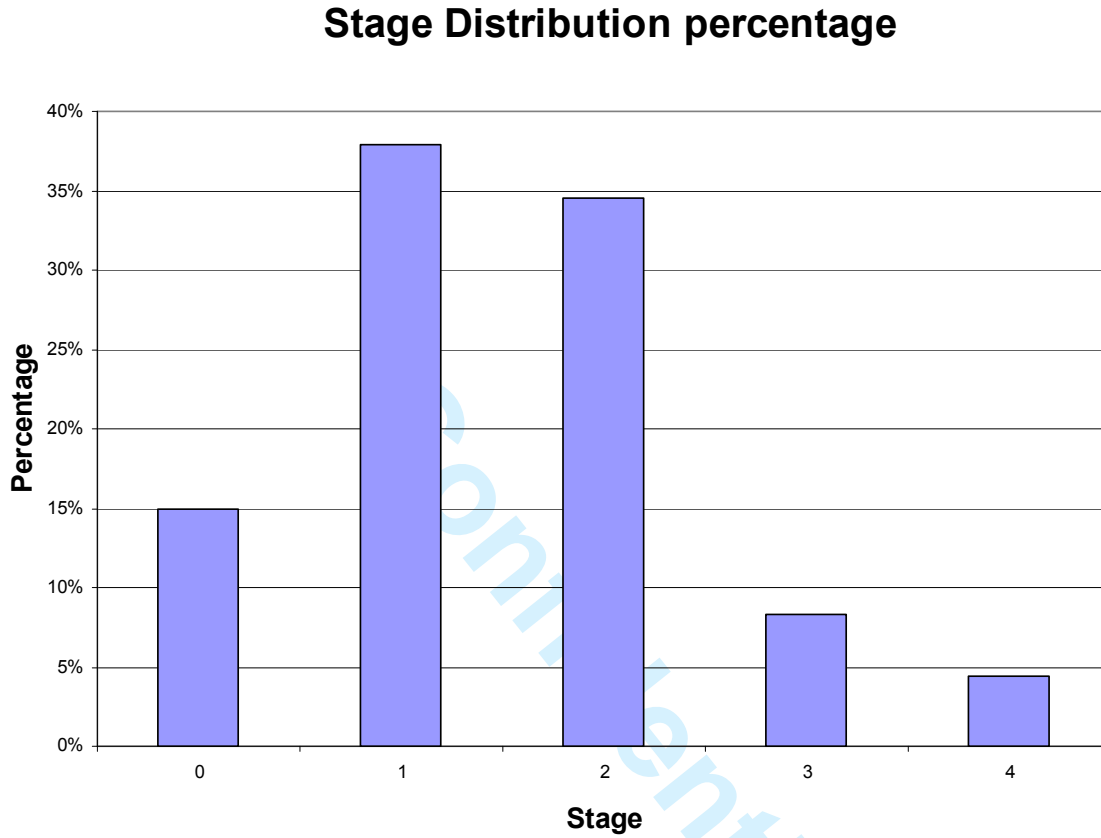

1  
2  
3  
4  
5  
6  
7  
8  
9  
10  
11  
12  
13  
14  
15  
16  
17  
18  
19  
20  
21  
22  
23  
24  
25  
26  
27  
28  
29  
30  
31  
32  
33  
34  
35  
36  
37  
38  
39  
40  
41  
42  
43  
44  
45  
46  
47  
48  
49  
50  
51  
52  
53  
54  
55  
56  
57  
58  
59  
60

Figure 2. Overall Survival (A) and Disease-Specific Survival (B) for patients diagnosed with breast cancer in the year 2002 in British Columbia.

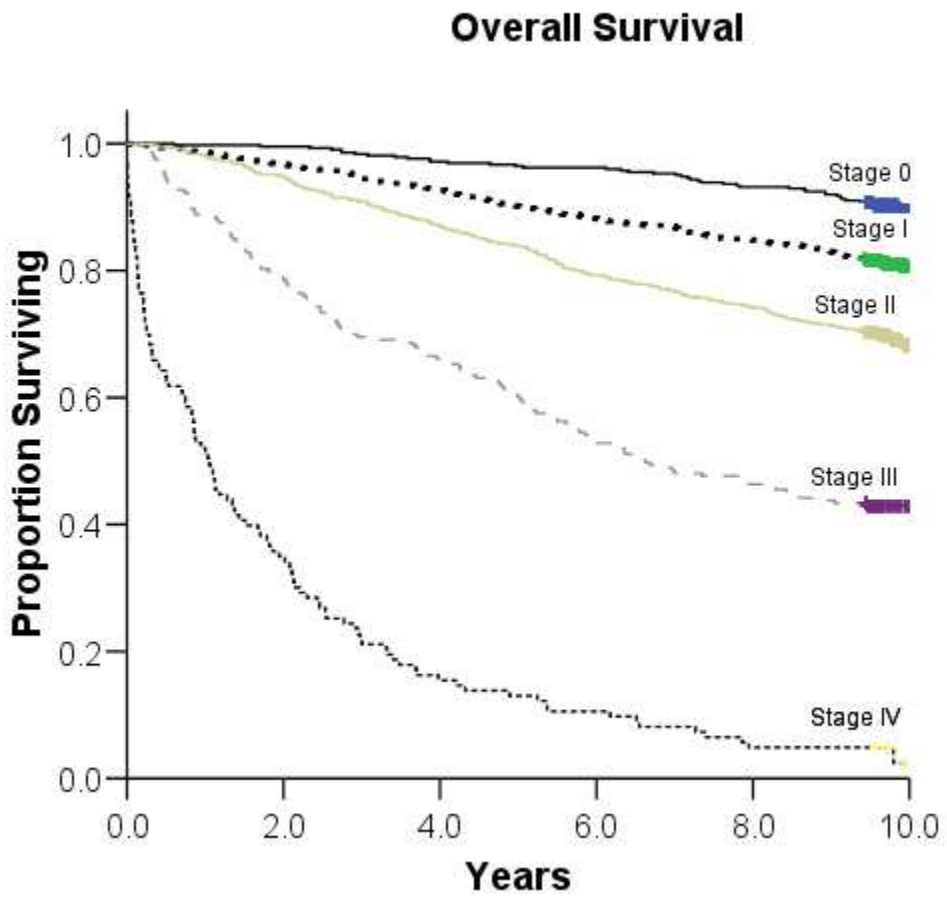

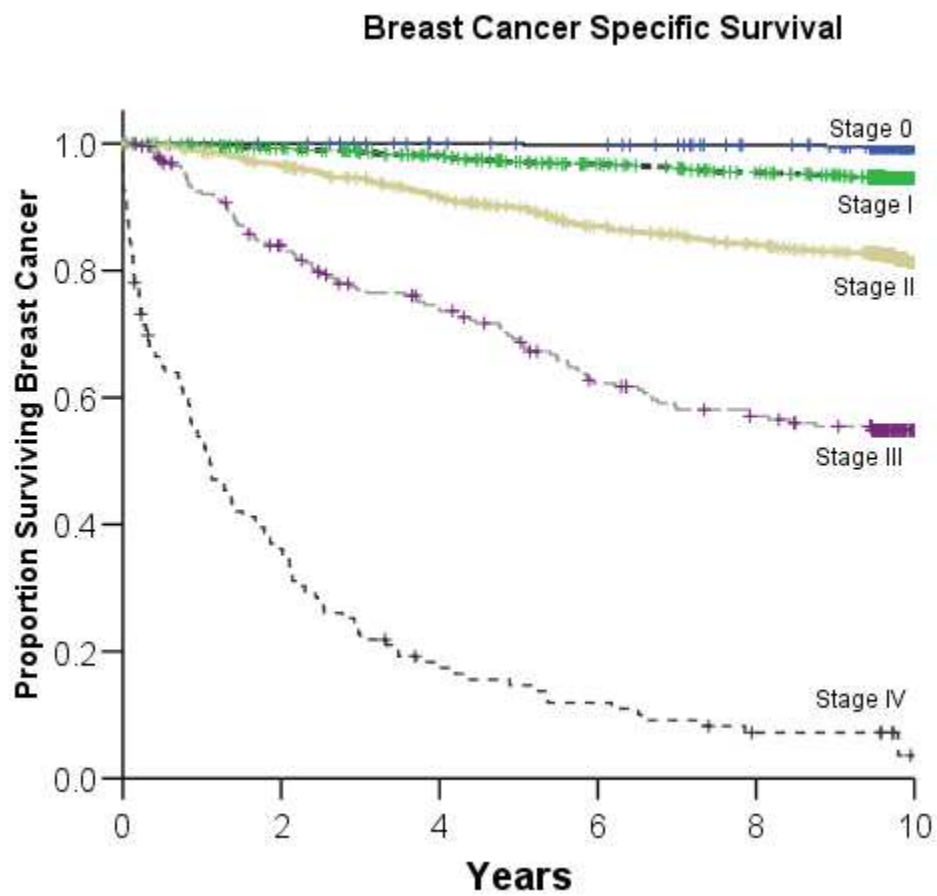

Table 1. Population Characteristics

|                         | All Stages    |     | Stage 0       |      | Stage I       |      | Stage II      |      | Stage III     |     | Stage IV      |     | Stage Unknown |     |
|-------------------------|---------------|-----|---------------|------|---------------|------|---------------|------|---------------|-----|---------------|-----|---------------|-----|
|                         | n             | %   | n             | %    | n             | %    | n             | %    | n             | %   | n             | %   | n             | %   |
|                         | 2927          | 100 | 424           | 14.5 | 1118          | 38.2 | 938           | 32.0 | 233           | 8.0 | 123           | 4.2 | 91            | 3.1 |
| <b>Gender</b>           |               |     |               |      |               |      |               |      |               |     |               |     |               |     |
| Female                  | 2909          | 99% | 422           | 100% | 1116          | 100% | 933           | 100% | 229           | 98% | 122           | 99% | 87            | 96% |
| <b>Age at diagnosis</b> |               |     |               |      |               |      |               |      |               |     |               |     |               |     |
| Median (range)          | 61 (27-102)   |     | 58 (28-94)    |      | 62 (29-98)    |      | 58.5(27-101)  |      | 59 (30-95)    |     | 64 (35-96)    |     | 74 (39-102)   |     |
| <40                     | 127           | 4%  | 6             | 1%   | 38            | 3%   | 62            | 7%   | 15            | 6%  | 5             | 4%  | 1             | 1%  |
| 40 – 49                 | 538           | 18% | 100           | 24%  | 176           | 16%  | 201           | 21%  | 46            | 20% | 9             | 7%  | 6             | 7%  |
| 50 – 59                 | 719           | 25% | 124           | 29%  | 261           | 23%  | 226           | 24%  | 62            | 27% | 33            | 27% | 13            | 14% |
| 60 – 69                 | 660           | 23% | 95            | 22%  | 290           | 26%  | 185           | 20%  | 40            | 17% | 29            | 24% | 21            | 23% |
| 70 – 79                 | 583           | 20% | 74            | 18%  | 267           | 24%  | 164           | 18%  | 35            | 15% | 23            | 19% | 20            | 22% |
| 80+                     | 300           | 10% | 25            | 6%   | 86            | 8%   | 100           | 11%  | 35            | 15% | 24            | 20% | 30            | 33% |
| <b>Margin status</b>    |               |     |               |      |               |      |               |      |               |     |               |     |               |     |
| Positive                | 123           | 4%  | 14            | 3%   | 20            | 2%   | 39            | 4%   | 26            | 11% | 15            | 12% | 9             | 10% |
| Negative                | 2356          | 81% | 371           | 88%  | 990           | 89%  | 795           | 85%  | 168           | 72% | 32            | 26% | 0             | -   |
| Close                   | 165           | 6%  | 29            | 7%   | 56            | 5%   | 61            | 7%   | 16            | 7%  | 3             | 2%  | 0             | -   |
| Unknown                 | 283           | 10% | 10            | 2%   | 52            | 5%   | 43            | 5%   | 23            | 10% | 73            | 59% | 82            | 90% |
| <b>Tumour Size</b>      |               |     |               |      |               |      |               |      |               |     |               |     |               |     |
| Median (range)          | 1.7 (0.1-9.9) |     | 1.5 (0.1-9.9) |      | 1.2 (0.1-2.0) |      | 2.5 (0.1-9.9) |      | 5.4 (0.1-9.9) |     | 4.3 (0.4-9.9) |     | 1.3 (1.1-1.5) |     |
| <1.0 cm                 | 529           | 18% | 122           | 29%  | 370           | 33%  | 27            | 3%   | 8             | 3%  | 2             | 2%  | 0             | -   |
| 1.0 to 2.0 cm           | 1110          | 38% | 139           | 33%  | 708           | 63%  | 227           | 24%  | 20            | 9%  | 14            | 11% | 2             | 2%  |
| 2.1 to 5.0 cm           | 822           | 28% | 90            | 21%  | 0             | -    | 628           | 67%  | 70            | 30% | 34            | 28% | 0             | -   |
| >5.0 cm                 | 204           | 7%  | 34            | 8%   | 0             | -    | 19            | 2%   | 115           | 49% | 36            | 29% | 0             | -   |
| Unknown                 | 262           | 9%  | 39            | 9%   | 40            | 4%   | 37            | 4%   | 20            | 9%  | 37            | 30% | 89            | 98% |
| <b>ER status</b>        |               |     |               |      |               |      |               |      |               |     |               |     |               |     |
| Positive                | 1920          | 66% | 30            | 7%   | 943           | 84%  | 707           | 75%  | 165           | 71% | 63            | 51% | 12            | 13% |
| Negative                | 457           | 16% | 13            | 3%   | 139           | 12%  | 219           | 23%  | 57            | 25% | 26            | 21% | 3             | 3%  |
| Unknown                 | 550           | 19% | 381           | 90%  | 36            | 3%   | 12            | 1%   | 11            | 5%  | 34            | 28% | 76            | 84% |
| <b>Grade</b>            |               |     |               |      |               |      |               |      |               |     |               |     |               |     |
| 1                       | 784           | 27% | 85            | 20%  | 487           | 44%  | 177           | 19%  | 22            | 9%  | 9             | 7%  | 4             | 4%  |
| 2                       | 1050          | 36% | 152           | 36%  | 413           | 37%  | 361           | 39%  | 82            | 35% | 35            | 29% | 7             | 8%  |
| 3                       | 875           | 30% | 147           | 35%  | 195           | 17%  | 383           | 41%  | 108           | 46% | 38            | 31% | 4             | 4%  |
| Unknown                 | 218           | 7%  | 40            | 9%   | 23            | 2%   | 17            | 2%   | 21            | 9%  | 41            | 33% | 76            | 84% |
| <b>LVI</b>              |               |     |               |      |               |      |               |      |               |     |               |     |               |     |
| Positive                | 519           | 18% | 0             | -    | 77            | 7%   | 297           | 32%  | 114           | 49% | 28            | 38% | 3             | 3%  |
| Negative                | 1747          | 60% | 18            | 4%   | 994           | 89%  | 600           | 64%  | 85            | 36% | 40            | 33% | 10            | 11% |
| Unknown                 | 661           | 23% | 406           | 96%  | 47            | 4%   | 41            | 4%   | 34            | 15% | 55            | 45% | 78            | 86% |



|                         |          |         |          |         |         |        |        |  |  |
|-------------------------|----------|---------|----------|---------|---------|--------|--------|--|--|
| <b># Positive nodes</b> |          |         |          |         |         |        |        |  |  |
| 0                       | 1439 49% | 71 17%  | 1005 90% | 339 36% | 17 7%   | 7 6%   | 0 -    |  |  |
| 1-3                     | 497 17%  | 0 -     | 0 -      | 422 45% | 65 28%  | 10 8%  | 0 -    |  |  |
| 4+                      | 252 9%   | 0 -     | 0 -      | 124 13% | 107 46% | 20 16% | 1 1%   |  |  |
| Positive (# unk)        | 3 0%     | 0 -     | 0 -      | 0 -     | 3 1%    | 0 -    | 0 -    |  |  |
| Nodal status unk        | 736 25%  | 353 83% | 113 10%  | 53 6%   | 41 18%  | 86 70% | 90 99% |  |  |
| <b>SMPBC attender</b>   |          |         |          |         |         |        |        |  |  |
| Yes                     | 1574 54% | 302 71% | 704 63%  | 431 46% | 81 35%  | 33 27% | 23 25% |  |  |
| No                      | 1353 46% | 122 29% | 414 37%  | 507 54% | 152 65% | 90 73% | 68 75% |  |  |
| <b>Screen detected*</b> |          |         |          |         |         |        |        |  |  |
| Yes                     | 971 62%  | 238 79% | 499 71%  | 189 44% | 25 31%  | 11 33% | 9 39%  |  |  |
| No                      | 603 38%  | 64 21%  | 205 29%  | 242 56% | 56 69%  | 22 67% | 14 61% |  |  |

\* Screen detected defined as diagnosis of breast cancer within 1 year of an abnormal screen. For patients with synchronous bilateral disease, the first diagnosis was used to define the screen detected variable, which was then assigned to both diagnoses.

ER = Estrogen Receptor

LVI = Lymphovascular Invasion

Unk = Unknown

SMPBC = Screening Mammography Program of British Columbia

Confidential

1  
2  
3  
4  
5  
6  
7  
8  
9  
10  
11  
12  
13  
14  
15  
16  
17  
18  
19  
20  
21  
22  
23  
24  
25  
26  
27  
28  
29  
30  
31  
32  
33  
34  
35  
36  
37  
38  
39  
40  
41  
42  
43  
44  
45  
46  
47  
48  
49  
50  
51  
52  
53  
54  
55  
56  
57  
58  
59  
60

**Table 2. Comparison of stage distribution for British Columbia and Surveillance Epidemiology and End Results breast cancer cases.**

| <b>Stage</b> | <b>BC % of Cases</b> | <b>SEER % of Cases</b> |
|--------------|----------------------|------------------------|
| In Situ      | 14%                  | 15%                    |
| I            | 38%                  | 42%                    |
| II           | 32%                  | 32%                    |
| III          | 8%                   | 7%                     |
| IV           | 4%                   | 4%                     |
| Unknown      | 3%                   | -                      |

Confidential

Table 3. Treatment Characteristics

|                                                          | All Stage |     | Stage 0 |      | Stage I |      | Stage II |       | Stage III |     | Stage IV |     | Stage Unknown |     |
|----------------------------------------------------------|-----------|-----|---------|------|---------|------|----------|-------|-----------|-----|----------|-----|---------------|-----|
|                                                          | n         | %   | n       | %    | n       | %    | n        | %     | n         | %   | n        | %   | n             | %   |
|                                                          | 2927      | 100 | 424     | 14.5 | 1118    | 38.2 | 938      | 32.0  | 233       | 8.0 | 123      | 4.2 | 91            | 3.1 |
| <b>Initial Surgery</b>                                   |           |     |         |      |         |      |          |       |           |     |          |     |               |     |
| None                                                     | 121       | 4%  | 1       | 0%   | 7       | 1%   | 13       | 1%    | 22        | 9%  | 65       | 53% | 13            | 14% |
| BCS                                                      | 1510      | 52% | 281     | 66%  | 726     | 65%  | 445      | 47%   | 34        | 15% | 22       | 18% | 2             | 2%  |
| Mastectomy                                               | 1086      | 37% | 104     | 25%  | 344     | 31%  | 458      | 49%   | 154       | 66% | 22       | 18% | 4             | 4%  |
| Unknown                                                  | 210       | 7%  | 38      | 9%   | 41      | 3%   | 22       | 2%    | 23        | 10% | 14       | 11% | 72            | 79% |
| <b>RT within 1 year of diagnosis</b>                     | 1649      | 56% | 159     | 38%  | 655     | 59%  | 599      | 64%   | 179       | 77% | 57       | 46% | 0             | -   |
| <b>RT within 5 years of diagnosis</b>                    | 1719      | 59% | 167     | 39%  | 679     | 61%  | 619      | 66%   | 184       | 79% | 65       | 52% | NA            |     |
| <b>RT within 1 year of BCS</b>                           | 1223      | 81% | 155     | 55%  | 639     | 88%  | 394      | 88.5% | 26        | 77% | NA       |     | NA            |     |
| <b>Chemotherapy (CT) within 1 year of diagnosis</b>      | 928       | 31% | 0       | -    | 159     | 14%  | 543      | 58%   | 166       | 71% | 53       | 43% | 7             | 8%  |
| <b>CT within 5 years of diagnosis</b>                    | 1008      | 34% | 0       | -    | 177     | 16%  | 558      | 59%   | 168       | 72% | 61       | 49% | NA            |     |
| <b>Hormonal therapy within 1 year of diagnosis (All)</b> | 1664      | 57% | 95      | 22%  | 709     | 63%  | 610      | 65%   | 156       | 67% | 63       | 51% | 31            | 34% |
| <b>HT within 5 years of diagnosis</b>                    | 1777      | 61% | 109     | 26%  | 734     | 66%  | 657      | 70%   | 169       | 73% | 67       | 54% | NA            |     |
| <b>Hormonal therapy within 1 year of diagnosis (ER+)</b> | 2283      | 78% | 89      | 21%  | 816     | 73%  | 788      | 84%   | 200       | 86% | 100      | 81% | NA            |     |

RT = Radiation Therapy

CT = Chemotherapy

HT = Hormone therapy

ER+ = Estrogen Receptor-Positive

**Table 4. Comparison of 5 year BCCA and optimal use of RT and systemic therapies.**

|                      |            | All Stages | Stage I | Stage II | Stage III | Stage IV |
|----------------------|------------|------------|---------|----------|-----------|----------|
| RT (%)               | BCCA       | 59         | 61      | 66       | 79        | 52       |
|                      | Ideal (19) | 66         | 69      | 82       | 95        | 64       |
|                      | Ideal (20) | 83         | 84      | 84       | 91        | 47       |
| Chemotherapy (%)     | BCCA       | 34         | 16      | 59       | 72        | 49       |
|                      | Ideal (21) | 59         | 56      | 56       | 90        | 29       |
| Hormonal therapy (%) | BCCA       | 61         | 66      | 70       | 73        | 54       |
|                      | Ideal (22) | 64         | NR      | NR       | NR        | NR       |

Confidential

**Table 5A. Comparison of British Columbia outcomes for patients diagnosed in 2002 with data from the United States SEER database.**

| <b>Stage</b>         | <b>5 Year OS<br/>BC</b> | <b>5 Year RSR<br/>BC</b> | <b>5 Year RSR<br/>USA<br/>SEER (18)</b> |
|----------------------|-------------------------|--------------------------|-----------------------------------------|
| In Situ              | <b>96%</b>              | <b>103%</b>              | 100%                                    |
| I                    | <b>90%</b>              | <b>98%</b>               | 100%                                    |
| II                   | <b>84%</b>              | <b>91%</b>               | 86%                                     |
| III                  | <b>60%</b>              | <b>65%</b>               | 57%                                     |
| IV                   | <b>12%</b>              | <b>13%</b>               | 20%                                     |
| <b>All<br/>Cases</b> | <b>83%</b>              | <b>90%</b>               | <b>89%</b>                              |

OS = Overall Survival  
 BC = British Columbia  
 RSR= Relative Survival Rate  
 SEER = Surveillance Epidemiology and End Results

1  
2  
3  
4  
5  
6  
7  
8  
9  
10  
11  
12  
13  
14  
15  
16  
17  
18  
19  
20  
21  
22  
23  
24  
25  
26  
27  
28  
29  
30  
31  
32  
33  
34  
35  
36  
37  
38  
39  
40  
41  
42  
43  
44  
45  
46  
47  
48  
49  
50  
51  
52  
53  
54  
55  
56  
57  
58  
59  
60

**Table 5B. Comparison of British Columbia outcomes for patients diagnosed in 2002 with data from other cancer registries in the United States and Europe.**

| <b>5 Year RSR BC</b> | <b>5 Year RSR USA SEER (18)</b> | <b>5 Year RSR ICBP Denmark (10)</b> | <b>5 Year RSR ICBP Norway (10)</b> | <b>5 Year RSR ICBP Sweden (10)</b> | <b>5 Year RSR ICBP UK (10)</b> | <b>5 Year OS EUROCARE (11)</b> | <b>Germany 5 Year RSR (23)</b> |
|----------------------|---------------------------------|-------------------------------------|------------------------------------|------------------------------------|--------------------------------|--------------------------------|--------------------------------|
| <b>90%</b>           | <b>89%</b>                      | <b>82%</b>                          | <b>84%</b>                         | <b>89.3%</b>                       | <b>78.8%</b>                   | <b>79%</b>                     | <b>81%</b>                     |

RSR= Relative Survival Rate  
 SEER = Surveillance Epidemiology and End Results  
 ICBP = International Cancer Benchmark Project  
 UK- United Kingdom

Confidential
